# Supplementary material for: The initial spread of peaches across eastern North America was structured by Indigenous communities and ecologies
Source: PubMed Central journal article supplement — Nat Commun. 2024 Sep 20;15:8245. doi: 10.1038/s41467-024-52597-8 (PMC11415391; doi:10.1038/s41467-024-52597-8), 2024-09-20
Supplement: 41467_2024_52597_MOESM3_ESM.pdf [file 41467_2024_52597_MOESM3_ESM.pdf]

## Description of Additional Supplementary Files

---

Supplementary Data 1: Table of Pre-18<sup>th</sup> century archaeological sites yielding peaches and used in this study to determine their spread across the American Southeast.

Supplementary Data 2: Table of AMS dates presented and used in this study to build Bayesian chronological models for individual sites across the Oconee Valley and eastern Tennessee.

Supplementary Code 1: All OxCal code used to produced the models in this study. Code included both model structures as well as raw data.

---
